# Supplementary material for: Lanthanide(iii) and group 13 metal ion complexes of tripodal amino phosphinate ligands
Source: Royal Society of Chemistry journal article supplement (doi:10.1039/b507905e), 2005-10-25

Electronic Supplementary Information for Dalton Transactions  
This journal is © The Royal Society of Chemistry 2005

**Lanthanide(III) and Group 13 Metal Ion Complexes of Tripodal Amine  
Phosphinate Ligands**

Michael S. Kovacs, Vishakha Monga, Brian O. Patrick, and Chris Orvig\*

Medicinal Inorganic Chemistry Group, Department of Chemistry, University of British  
Columbia, 2036 Main Mall, Vancouver, B.C. V6T 1Z1, Canada.  
Email: [orvig@chem.ubc.ca](mailto:orvig@chem.ubc.ca)

**X-ray crystallographic analysis of [Ga(H<sub>3</sub>ppba)<sub>2</sub>][(NO<sub>3</sub>)<sub>2</sub>Cl]·3CH<sub>3</sub>OH (1).** Data were collected on a Rigaku/ADSC CCD diffractometer at UBC at -100(1)<sup>o</sup>C. The structure was solved by direct methods<sup>8</sup> and was expanded using Fourier techniques.<sup>3</sup> All hydrogen atoms other than those involved in hydrogen-bonding were included in calculated positions but were not refined. The unit cell contains several void spaces where solvents and counterions reside. While there are areas with significant electron density, no satisfactory models for Cl<sup>-</sup>, NO<sub>3</sub><sup>-</sup> or CH<sub>3</sub>OH were possible. As a result, the data were corrected for the electron density in these void spaces using PLATON.<sup>5</sup> The corrected data greatly improved the residuals (R1 = 0.12 to 0.048). No inferences should be made as to the nature of the counterions or the amount of solvent molecules in the asymmetric unit. Readers should refer to elemental analysis results for the elucidation of the exact chemical composition of this material. Complete lists of bond lengths and bond angles appear in Tables S2 and S3.

**X-ray crystallographic analysis of [Gd(H<sub>4</sub>ppba)<sub>2</sub>][(NO<sub>3</sub>)<sub>4</sub>Cl]·3CH<sub>3</sub>OH (2).** Data were collected on a Rigaku/ADSC CCD diffractometer at UBC at -100(1)<sup>o</sup>C. The structure was solved by direct methods<sup>8</sup> and was expanded using Fourier techniques.<sup>3</sup> The material resides on a 3-fold inversion axis, with the Gd atom having a population of 1/6. Both N(1) and N(2) appear to be protonated, with the protons found and refined from a difference map. The anions appear to be a disordered mixture of Cl<sup>-</sup> and NO<sub>3</sub><sup>-</sup>. Restraints were used to fix the geometries of the two disordered NO<sub>3</sub><sup>-</sup> fragments, and relative populations of 0.5 and 0.166667 were given to the major and minor fragments, respectively. A population of 0.166667 was also given to Cl(1). Unresolvable disordered solvent molecules reside in the large voids between the cationic Gd-complexes in the unit

cell. The data were therefore corrected using PLATON/SQUEEZE.<sup>5</sup> R1 was found to drop from 0.079 to 0.034. Complete lists of bond lengths and bond angles appear in Tables S4 and S5.

## References

- 1) Beurskens, P. T.; Admiraal, G.; Beurskens, W. P.; Garcia-Granda, S.; Gould, R. O.; Smits, J. M. M.; Smykalla, C. *The DIRDIF program system*; Technical Report of the Crystallography Laboratory: University of Nijmegen, The Netherlands, 1992.
- 2) Altomare, A.; Burla, M. C.; Cammali, G.; Cascarano, M.; Giacovazzo, C.; Guagliardi, A.; Moliterni, A. G. G.; Polidori, G.; Spagna, A. *J. Appl. Cryst.* **1999**, *32*, 115.
- 3) Beurskens, P. T.; Admiraal, G.; Beurskens, G.; Bosman, W. P.; de Gelder, R.; Israel, R.; Smits, J. M. M. *The DIRDIF-94 program system*; Technical Report of the Crystallography Laboratory: University of Nijmegen, The Netherlands, 1994.
- 4) Sheldrick, G. M. *SHELXL-97, Program for Crystal Structure Refinement*; University of Göttingen: Germany, 1997.
- 5) Spek, A. L. *Acta Crystallogr.* **1990**, *A46*, 34.
- 6) Sheldrick, G. M. *SHELX76, Program for Crystal Structure Determination*; University of Cambridge: England, 1976.
- 7) Sheldrick, G. M. *SHELXS86, Program for the Solution of Crystal Structures*; University of Göttingen: Germany, 1986.
- 8) Altomare, A.; Cascarano, M.; Giacovazzo, C.; Guagliardi, A. *J. Appl. Cryst.* **1994**, *26*, 343.

**Table S1.** Selected Crystallographic Data for **1** and **2**.

|                            | <b>1</b>                                                                         | <b>2</b>                                                                             |
|----------------------------|----------------------------------------------------------------------------------|--------------------------------------------------------------------------------------|
| Formula                    | C <sub>96</sub> H <sub>114</sub> GaN <sub>8</sub> O <sub>12</sub> P <sub>6</sub> | C <sub>96</sub> H <sub>116</sub> GdN <sub>12</sub> O <sub>24</sub> P <sub>6</sub> Cl |
| FW                         | 1827.49                                                                          | 2200.53                                                                              |
| Crystal System             | trigonal                                                                         | trigonal                                                                             |
| a, Å                       | 23.9800(7)                                                                       | 14.9142(4)                                                                           |
| b, Å                       | 23.9800(7)                                                                       | 14.9142(4)                                                                           |
| c, Å                       | 32.5706(9)                                                                       | 44.202(2)                                                                            |
| α, °                       | 90                                                                               | 90                                                                                   |
| β, °                       | 90                                                                               | 90                                                                                   |
| γ, °                       | 120                                                                              | 120                                                                                  |
| V, Å <sup>3</sup>          | 16220.1(8)                                                                       | 8514.4(5)                                                                            |
| T, K                       | 173                                                                              | 198                                                                                  |
| Z                          | 6                                                                                | 3                                                                                    |
| Space group                | R $\bar{3}c$                                                                     | R-3                                                                                  |
| μ, mm <sup>-1</sup>        | 0.399                                                                            | 0.762                                                                                |
| # reflections              | 46807                                                                            | 18646                                                                                |
| # unique                   | 4271                                                                             | 4368                                                                                 |
| R(int)                     | 0.031                                                                            | 0.045                                                                                |
| R <sub>1</sub> (I > 2σ(I)) | 0.046                                                                            | 0.034                                                                                |
| wR <sub>2</sub> (all data) | 0.134                                                                            | 0.093                                                                                |

$$R_1 = \frac{\sum |F_o| - |F_c|}{\sum |F_o|}, wR_2 = \left\{ \frac{\sum [w(F_o^2 - F_c^2)^2]}{\sum [w(F_o^2)^2]} \right\}^{1/2}$$

**Table S2.** Bond Lengths (Å) for [Ga(H<sub>3</sub>ppba)<sub>2</sub>](NO<sub>3</sub>)<sub>2</sub>Cl·3CH<sub>3</sub>OH (**1**).

|              |            |
|--------------|------------|
| C(1)-N(1)    | 1.479(2)   |
| C(1)-C(2)    | 1.520(3)   |
| C(1)-H(1A)   | 0.9900     |
| C(1)-H(1B)   | 0.9900     |
| C(2)-N(2)    | 1.511(3)   |
| C(2)-H(2A)   | 0.9900     |
| C(2)-H(2B)   | 0.9900     |
| C(3)-N(2)    | 1.495(2)   |
| C(3)-P(1)    | 1.8355(19) |
| C(3)-H(3A)   | 0.9900     |
| C(3)-H(3B)   | 0.9900     |
| C(4)-C(5)    | 1.389(3)   |
| C(4)-C(9)    | 1.392(3)   |
| C(4)-P(1)    | 1.796(2)   |
| C(5)-C(6)    | 1.388(3)   |
| C(5)-H(5)    | 0.9500     |
| C(6)-C(7)    | 1.369(4)   |
| C(6)-H(6)    | 0.9500     |
| C(7)-C(8)    | 1.387(4)   |
| C(7)-H(7)    | 0.9500     |
| C(8)-C(9)    | 1.383(3)   |
| C(8)-H(8)    | 0.9500     |
| C(9)-H(9)    | 0.9500     |
| C(10)-C(11)  | 1.510(3)   |
| C(10)-N(2)   | 1.524(3)   |
| C(10)-H(10A) | 0.9900     |
| C(10)-H(10B) | 0.9900     |
| C(11)-C(16)  | 1.391(3)   |
| C(11)-C(12)  | 1.394(3)   |
| C(12)-C(13)  | 1.401(4)   |
| C(12)-H(12)  | 0.9500     |
| C(13)-C(14)  | 1.375(5)   |
| C(13)-H(13)  | 0.9500     |
| C(14)-C(15)  | 1.374(5)   |
| C(14)-H(14)  | 0.9500     |
| C(15)-C(16)  | 1.389(3)   |
| C(15)-H(15)  | 0.9500     |
| C(16)-H(16)  | 0.9500     |
| N(1)-C(1)#1  | 1.479(2)   |
| N(1)-C(1)#2  | 1.479(2)   |
| N(2)-H(2N)   | 0.94(3)    |
| O(1)-P(1)    | 1.5051(13) |
| O(1)-Ga(1)   | 1.9501(13) |
| O(2)-P(1)    | 1.4923(14) |
| Ga(1)-O(1)#3 | 1.9500(13) |
| Ga(1)-O(1)#1 | 1.9501(13) |
| Ga(1)-O(1)#4 | 1.9501(13) |
| Ga(1)-O(1)#2 | 1.9501(13) |
| Ga(1)-O(1)#5 | 1.9501(13) |

**Table S3.** Bond Angles (deg) for [Ga(H<sub>3</sub>ppba)<sub>2</sub>](NO<sub>3</sub>)<sub>2</sub>Cl·3CH<sub>3</sub>OH (**1**).

|                     |            |
|---------------------|------------|
| N(1)-C(1)-C(2)      | 112.39(18) |
| N(1)-C(1)-H(1A)     | 109.1      |
| C(2)-C(1)-H(1A)     | 109.1      |
| N(1)-C(1)-H(1B)     | 109.1      |
| C(2)-C(1)-H(1B)     | 109.1      |
| H(1A)-C(1)-H(1B)    | 107.9      |
| N(2)-C(2)-C(1)      | 112.03(17) |
| N(2)-C(2)-H(2A)     | 109.2      |
| C(1)-C(2)-H(2A)     | 109.2      |
| N(2)-C(2)-H(2B)     | 109.2      |
| C(1)-C(2)-H(2B)     | 109.2      |
| H(2A)-C(2)-H(2B)    | 107.9      |
| N(2)-C(3)-P(1)      | 114.14(13) |
| N(2)-C(3)-H(3A)     | 108.7      |
| P(1)-C(3)-H(3A)     | 108.7      |
| N(2)-C(3)-H(3B)     | 108.7      |
| P(1)-C(3)-H(3B)     | 108.7      |
| H(3A)-C(3)-H(3B)    | 107.6      |
| C(5)-C(4)-C(9)      | 119.2(2)   |
| C(5)-C(4)-P(1)      | 119.78(17) |
| C(9)-C(4)-P(1)      | 120.86(16) |
| C(6)-C(5)-C(4)      | 120.2(2)   |
| C(6)-C(5)-H(5)      | 119.9      |
| C(4)-C(5)-H(5)      | 119.9      |
| C(7)-C(6)-C(5)      | 120.2(2)   |
| C(7)-C(6)-H(6)      | 119.9      |
| C(5)-C(6)-H(6)      | 119.9      |
| C(6)-C(7)-C(8)      | 120.1(2)   |
| C(6)-C(7)-H(7)      | 119.9      |
| C(8)-C(7)-H(7)      | 119.9      |
| C(9)-C(8)-C(7)      | 120.1(3)   |
| C(9)-C(8)-H(8)      | 120.0      |
| C(7)-C(8)-H(8)      | 120.0      |
| C(8)-C(9)-C(4)      | 120.1(2)   |
| C(8)-C(9)-H(9)      | 119.9      |
| C(4)-C(9)-H(9)      | 119.9      |
| C(11)-C(10)-N(2)    | 114.52(16) |
| C(11)-C(10)-H(10A)  | 108.6      |
| N(2)-C(10)-H(10A)   | 108.6      |
| C(11)-C(10)-H(10B)  | 108.6      |
| N(2)-C(10)-H(10B)   | 108.6      |
| H(10A)-C(10)-H(10B) | 107.6      |
| C(16)-C(11)-C(12)   | 118.6(2)   |
| C(16)-C(11)-C(10)   | 121.6(2)   |
| C(12)-C(11)-C(10)   | 119.7(2)   |
| C(11)-C(12)-C(13)   | 120.3(3)   |
| C(11)-C(12)-H(12)   | 119.9      |
| C(13)-C(12)-H(12)   | 119.9      |
| C(14)-C(13)-C(12)   | 119.7(3)   |
| C(14)-C(13)-H(13)   | 120.2      |
| C(12)-C(13)-H(13)   | 120.2      |
| C(15)-C(14)-C(13)   | 120.8(2)   |

Electronic Supplementary Information for Dalton Transactions  
This journal is © The Royal Society of Chemistry 2005

|                     |            |
|---------------------|------------|
| C(15)-C(14)-H(14)   | 119.6      |
| C(13)-C(14)-H(14)   | 119.6      |
| C(14)-C(15)-C(16)   | 119.8(3)   |
| C(14)-C(15)-H(15)   | 120.1      |
| C(16)-C(15)-H(15)   | 120.1      |
| C(15)-C(16)-C(11)   | 120.8(3)   |
| C(15)-C(16)-H(16)   | 119.6      |
| C(11)-C(16)-H(16)   | 119.6      |
| C(1)#1-N(1)-C(1)#2  | 108.90(15) |
| C(1)#1-N(1)-C(1)    | 108.90(15) |
| C(1)#2-N(1)-C(1)    | 108.90(15) |
| C(3)-N(2)-C(2)      | 111.22(15) |
| C(3)-N(2)-C(10)     | 111.39(16) |
| C(2)-N(2)-C(10)     | 112.16(16) |
| C(3)-N(2)-H(2N)     | 105.7(17)  |
| C(2)-N(2)-H(2N)     | 113.9(17)  |
| C(10)-N(2)-H(2N)    | 101.9(17)  |
| P(1)-O(1)-Ga(1)     | 143.83(8)  |
| O(2)-P(1)-O(1)      | 120.24(8)  |
| O(2)-P(1)-C(4)      | 109.84(9)  |
| O(1)-P(1)-C(4)      | 110.32(9)  |
| O(2)-P(1)-C(3)      | 110.76(9)  |
| O(1)-P(1)-C(3)      | 104.05(8)  |
| C(4)-P(1)-C(3)      | 99.51(9)   |
| O(1)#3-Ga(1)-O(1)#1 | 180.00(7)  |
| O(1)#3-Ga(1)-O(1)#4 | 91.15(6)   |
| O(1)#1-Ga(1)-O(1)#4 | 88.85(6)   |
| O(1)#3-Ga(1)-O(1)   | 88.85(6)   |
| O(1)#1-Ga(1)-O(1)   | 91.15(6)   |
| O(1)#4-Ga(1)-O(1)   | 180.0      |
| O(1)#3-Ga(1)-O(1)#2 | 88.85(6)   |
| O(1)#1-Ga(1)-O(1)#2 | 91.15(6)   |
| O(1)#4-Ga(1)-O(1)#2 | 88.85(6)   |
| O(1)-Ga(1)-O(1)#2   | 91.15(6)   |
| O(1)#3-Ga(1)-O(1)#5 | 91.15(6)   |
| O(1)#1-Ga(1)-O(1)#5 | 88.85(6)   |
| O(1)#4-Ga(1)-O(1)#5 | 91.15(6)   |
| O(1)-Ga(1)-O(1)#5   | 88.85(6)   |
| O(1)#2-Ga(1)-O(1)#5 | 180.0      |

**Table S4.** Bond Lengths (Å) for [Gd(H<sub>4</sub>ppba)<sub>2</sub>](NO<sub>3</sub>)<sub>4</sub>Cl·3CH<sub>3</sub>OH (**2**).

|          |            |           |          |
|----------|------------|-----------|----------|
| Gd1 -O2  | 2.2841(17) | C10 -C11  | 1.379(5) |
| P1 -O1   | 1.500(2)   | C11 -C12  | 1.392(7) |
| P1 -O2   | 1.5104(16) | C12 -C13  | 1.365(6) |
| P1 -C1   | 1.797(3)   | C13 -C14  | 1.397(5) |
| P1 -C7   | 1.845(3)   | C15 -C16  | 1.517(4) |
| O3A -N3A | 1.214(17)  | C2 -H2    | 0.9514   |
| O3B -N3B | 1.07(3)    | C3 -H3    | 0.9511   |
| O5A -N3A | 1.113(14)  | C4 -H4    | 0.9502   |
| O5B -N3B | 1.22(3)    | C5 -H5    | 0.9497   |
| N1 -C7   | 1.498(3)   | C6 -H6    | 0.9512   |
| N1 -C8   | 1.524(3)   | C7 -H7B   | 0.9889   |
| N1 -C15  | 1.522(3)   | C7 -H7A   | 0.9893   |
| N2 -C16  | 1.514(3)   | C8 -H8B   | 0.9906   |
| N1 -H1A  | 0.98(5)    | C8 -H8A   | 0.9889   |
| N2 -H2A  | 0.89(7)    | C10 -H10  | 0.9496   |
| C1 -C2   | 1.388(4)   | C11 -H11  | 0.9497   |
| C1 -C6   | 1.393(4)   | C12 -H12  | 0.9500   |
| C2 -C3   | 1.387(4)   | C13 -H13  | 0.9502   |
| C3 -C4   | 1.378(5)   | C14 -H14  | 0.9508   |
| C4 -C5   | 1.377(6)   | C15 -H15B | 0.9907   |
| C5 -C6   | 1.396(5)   | C15 -H15A | 0.9902   |
| C8 -C9   | 1.502(4)   | C16 -H16A | 0.9891   |
| C9 -C10  | 1.384(4)   | C16 -H16B | 0.9907   |
| C9 -C14  | 1.393(5)   |           |          |



**Table S5.** Bond Angles (deg) for [Gd(H<sub>4</sub>ppba)<sub>2</sub>](NO<sub>3</sub>)<sub>4</sub>Cl·3CH<sub>3</sub>OH (**2**).

|                  |            |                 |            |
|------------------|------------|-----------------|------------|
| O2 -Gd1 -O2_a    | 87.52(6)   | C15 -N1 -H1A    | 104.1(19)  |
| O2 -Gd1 -O2_b    | 87.52(7)   | C7 -N1 -H1A     | 112.4(18)  |
| O2 -Gd1 -O2_c    | 180.00     | C8 -N1 -H1A     | 109.2(16)  |
| O2 -Gd1 -O2_d    | 92.48(6)   | C16 -N2 -H2A    | 109.92(15) |
| O2 -Gd1 -O2_e    | 92.48(7)   | C16_a -N2 -H2A  | 109.92(16) |
| O2_a -Gd1 -O2_b  | 87.52(6)   | C16_b -N2 -H2A  | 109.92(15) |
| O2_a -Gd1 -O2_c  | 92.48(6)   | O3A -N3A -O5A   | 122.2(14)  |
| O2_a -Gd1 -O2_d  | 180.00     | O3B -N3B -O5B   | 118(3)     |
| O2_a -Gd1 -O2_e  | 92.48(6)   | P1 -C1 -C6      | 121.1(2)   |
| O2_b -Gd1 -O2_c  | 92.48(7)   | C2 -C1 -C6      | 119.3(3)   |
| O2_b -Gd1 -O2_d  | 92.48(6)   | P1 -C1 -C2      | 119.7(2)   |
| O2_b -Gd1 -O2_e  | 180.00     | C1 -C2 -C3      | 120.7(3)   |
| O2_c -Gd1 -O2_d  | 87.52(6)   | C2 -C3 -C4      | 119.5(3)   |
| O2_c -Gd1 -O2_e  | 87.52(7)   | C3 -C4 -C5      | 120.8(3)   |
| O2_d -Gd1 -O2_e  | 87.52(6)   | C4 -C5 -C6      | 119.9(3)   |
| O1 -P1 -O2       | 117.45(11) | C1 -C6 -C5      | 119.8(3)   |
| O1 -P1 -C1       | 112.67(11) | P1 -C7 -N1      | 113.9(2)   |
| O1 -P1 -C7       | 108.17(10) | N1 -C8 -C9      | 115.7(2)   |
| O2 -P1 -C1       | 107.45(11) | C8 -C9 -C14     | 119.1(3)   |
| O2 -P1 -C7       | 107.94(10) | C10 -C9 -C14    | 118.7(3)   |
| C1 -P1 -C7       | 101.97(12) | C8 -C9 -C10     | 121.9(3)   |
| Gd1 -O2 -P1      | 143.85(10) | C9 -C10 -C11    | 121.0(3)   |
| C7 -N1 -C8       | 112.1(2)   | C10 -C11 -C12   | 119.9(4)   |
| C7 -N1 -C15      | 111.03(19) | C11 -C12 -C13   | 119.8(3)   |
| C8 -N1 -C15      | 107.59(18) | C12 -C13 -C14   | 120.4(3)   |
| C16 -N2 -C16_a   | 109.0(2)   | C9 -C14 -C13    | 120.1(3)   |
| C16 -N2 -C16_b   | 109.0(2)   | N1 -C15 -C16    | 113.4(2)   |
| C16_a -N2 -C16_b | 109.0(2)   | N2 -C16 -C15    | 114.7(2)   |
| C3 -C2 -H2       | 119.61     | C11 -C10 -H10   | 119.54     |
| C1 -C2 -H2       | 119.64     | C9 -C10 -H10    | 119.46     |
| C4 -C3 -H3       | 120.30     | C10 -C11 -H11   | 120.05     |
| C2 -C3 -H3       | 120.19     | C12 -C11 -H11   | 120.03     |
| C5 -C4 -H4       | 119.71     | C11 -C12 -H12   | 120.07     |
| C3 -C4 -H4       | 119.53     | C13 -C12 -H12   | 120.10     |
| C4 -C5 -H5       | 120.05     | C12 -C13 -H13   | 119.81     |
| C6 -C5 -H5       | 120.08     | C14 -C13 -H13   | 119.79     |
| C1 -C6 -H6       | 120.13     | C13 -C14 -H14   | 120.02     |
| C5 -C6 -H6       | 120.04     | C9 -C14 -H14    | 119.87     |
| N1 -C7 -H7A      | 108.84     | C16 -C15 -H15A  | 108.81     |
| N1 -C7 -H7B      | 108.77     | N1 -C15 -H15A   | 108.97     |
| H7A -C7 -H7B     | 107.55     | N1 -C15 -H15B   | 108.94     |
| P1 -C7 -H7B      | 108.79     | H15A -C15 -H15B | 107.61     |
| P1 -C7 -H7A      | 108.77     | C16 -C15 -H15B  | 108.92     |
| C9 -C8 -H8A      | 108.43     | N2 -C16 -H16B   | 108.56     |
| N1 -C8 -H8A      | 108.32     | N2 -C16 -H16A   | 108.64     |
| N1 -C8 -H8B      | 108.34     | H16A -C16 -H16B | 107.47     |
| H8A -C8 -H8B     | 107.47     | C15 -C16 -H16A  | 108.61     |
| C9 -C8 -H8B      | 108.32     | C15 -C16 -H16B  | 108.66     |

**Table S6.** Preparative details for the synthesis of  $[M(H_3ppba)_2](NO_3)_2Cl \cdot xCH_3OH$ .

| $M^{3+}$ -salt starting material | Product                                                | Yield |
|----------------------------------|--------------------------------------------------------|-------|
| $Al(NO_3)_3 \cdot 9H_2O$         | $[Al(H_3ppba)_2](NO_3)_2Cl \cdot 3CH_3OH$              | 84%   |
| $Ga(NO_3)_3 \cdot 6H_2O$         | $[Ga(H_3ppba)_2](NO_3)_2Cl \cdot 3CH_3OH$ ( <b>1</b> ) | 84%   |
| $In(NO_3)_3 \cdot H_2O$          | $[In(H_3ppba)_2](NO_3)_2Cl \cdot 3CH_3OH$              | 73%   |
| $Ho(NO_3)_3 \cdot 5H_2O$         | $[Ho(H_3ppba)_2](NO_3)_2Cl \cdot 3CH_3OH$              | 45%   |
| $Er(NO_3)_3 \cdot 5H_2O$         | $[Er(H_3ppba)_2](NO_3)_2Cl \cdot 3CH_3OH$              | 28%   |
| $Tm(NO_3)_3 \cdot 5H_2O$         | $[Tm(H_3ppba)_2](NO_3)_2Cl \cdot 3CH_3OH$              | 52%   |
| $Yb(NO_3)_3 \cdot 5H_2O$         | $[Yb(H_3ppba)_2](NO_3)_2Cl \cdot 3CH_3OH$              | 46%   |
| $Lu(NO_3)_3 \cdot 5H_2O$         | $[Lu(H_3ppba)_2](NO_3)_2Cl \cdot 2CH_3OH$              | 31%   |

**Table S7.** Preparative details for the synthesis of  $[M(H_4ppba)_2](NO_3)_4Cl \cdot xCH_3OH$ .

| $M^{3+}$ -salt starting material | Product                                                | Yield* |
|----------------------------------|--------------------------------------------------------|--------|
| $La(NO_3)_3 \cdot 6H_2O$         | $[La(H_4ppba)_2](NO_3)_4Cl \cdot xCH_3OH$              |        |
| $Ce(NO_3)_3 \cdot 6H_2O$         | $[Ce(H_4ppba)_2](NO_3)_4Cl \cdot xCH_3OH$              |        |
| $Pr(NO_3)_3 \cdot 6H_2O$         | $[Pr(H_4ppba)_2](NO_3)_4Cl \cdot xCH_3OH$              |        |
| $Nd(NO_3)_3 \cdot 5H_2O$         | $[Nd(H_4ppba)_2](NO_3)_4Cl \cdot xCH_3OH$              |        |
| $Sm(NO_3)_3 \cdot 6H_2O$         | $[Sm(H_4ppba)_2](NO_3)_4Cl \cdot xCH_3OH$              |        |
| $Eu(NO_3)_3 \cdot 6H_2O$         | $[Eu(H_4ppba)_2](NO_3)_4Cl \cdot 5CH_3OH$              | 8%     |
| $Gd(NO_3)_3 \cdot 6H_2O$         | $[Gd(H_4ppba)_2](NO_3)_4Cl \cdot 3CH_3OH$ ( <b>2</b> ) | 13%    |
| $Tb(NO_3)_3 \cdot 5H_2O$         | $[Tb(H_4ppba)_2](NO_3)_4Cl \cdot 10CH_3OH$             | 11%    |
| $Dy(NO_3)_3 \cdot 5H_2O$         | $[Dy(H_4ppba)_2](NO_3)_4Cl \cdot xCH_3OH$              |        |

\* Yields are not reported for complexes that were not isolated in pure form (*vide infra*).

**Table S8.** Preparative details for the synthesis of  $[M(H_4ppba)](NO_3)_3Cl \cdot xH_2O$ .

| $M^{3+}$ -salt starting material | Product                                            | Yield |
|----------------------------------|----------------------------------------------------|-------|
| $La(NO_3)_3 \cdot 6H_2O$         | $[La(H_4ppba)](NO_3)_3Cl \cdot 3H_2O$              | 15%   |
| $Ce(NO_3)_3 \cdot 6H_2O$         | $[Ce(H_4ppba)](NO_3)_3Cl \cdot 5H_2O$              | 16%   |
| $Pr(NO_3)_3 \cdot 6H_2O$         | $[Pr(H_4ppba)](NO_3)_3Cl \cdot 4H_2O$              | 18%   |
| $Nd(NO_3)_3 \cdot 5H_2O$         | $[Nd(H_4ppba)](NO_3)_3Cl \cdot 4H_2O$              | 16%   |
| $Sm(NO_3)_3 \cdot 6H_2O$         | $[Sm(H_4ppba)](NO_3)_3Cl \cdot 3H_2O$              | 24%   |
| $Eu(NO_3)_3 \cdot 6H_2O$         | $[Eu(H_4ppba)](NO_3)_3Cl \cdot 3H_2O$              | 34%   |
| $Gd(NO_3)_3 \cdot 6H_2O$         | $[Gd(H_4ppba)](NO_3)_3Cl \cdot 3H_2O$ ( <b>3</b> ) | 33%   |
| $Tb(NO_3)_3 \cdot 5H_2O$         | $[Tb(H_4ppba)](NO_3)_3Cl \cdot 3H_2O$              | 30%   |
| $Dy(NO_3)_3 \cdot 5H_2O$         | $[Dy(H_4ppba)](NO_3)_3Cl \cdot 3H_2O$              | 30%   |
| $Ho(NO_3)_3 \cdot 5H_2O$         | $[Ho(H_4ppba)](NO_3)_3Cl \cdot 3H_2O$              | 22%   |
| $Er(NO_3)_3 \cdot 5H_2O$         | $[Er(H_4ppba)](NO_3)_3Cl \cdot 3H_2O$              | 14%   |

**Table S9.** Preparative details for the synthesis of  $[M(H_3ppa)](NO_3)_2Cl \cdot xH_2O$ .

| $M^{3+}$ -salt starting material | Product                                             | Yield |
|----------------------------------|-----------------------------------------------------|-------|
| $Ga(NO_3)_3 \cdot 6H_2O$         | $[Ga(ppa)] \cdot 3H_2O$ ( <b>6</b> )                | 56%   |
| $In(NO_3)_3 \cdot H_2O$          | $[In(H_3ppa)](NO_3)_2Cl \cdot 2CH_3OH$ ( <b>5</b> ) | 71%   |
| $La(NO_3)_3 \cdot 6H_2O$         | $[La(H_3ppa)](NO_3)_2Cl \cdot 4H_2O$                | 50%   |
| $Ce(NO_3)_3 \cdot 6H_2O$         | $[Ce(H_3ppa)](NO_3)_2Cl \cdot H_2O$                 | 53%   |
| $Pr(NO_3)_3 \cdot 6H_2O$         | $[Pr(H_3ppa)](NO_3)_2Cl \cdot 3H_2O$                | 62%   |
| $Nd(NO_3)_3 \cdot 5H_2O$         | $[Nd(H_3ppa)](NO_3)_2Cl \cdot 3H_2O$                | 71%   |
| $Sm(NO_3)_3 \cdot 6H_2O$         | $[Sm(H_3ppa)](NO_3)_2Cl \cdot 3H_2O$                | 78%   |
| $Eu(NO_3)_3 \cdot 6H_2O$         | $[Eu(H_3ppa)](NO_3)_2Cl \cdot 3H_2O$ ( <b>4</b> )   | 80%   |
| $Gd(NO_3)_3 \cdot 6H_2O$         | $[Gd(H_3ppa)](NO_3)_2Cl \cdot 3H_2O$                | 50%   |
| $Dy(NO_3)_3 \cdot 5H_2O$         | $[Dy(H_3ppa)](NO_3)_2Cl \cdot H_2O$                 | 73%   |
| $Er(NO_3)_3 \cdot 5H_2O$         | $[Er(H_3ppa)](NO_3)_2Cl \cdot 2H_2O$                | 83%   |
| $Yb(NO_3)_3 \cdot 5H_2O$         | $[Yb(H_3ppa)](NO_3)_2Cl \cdot 2H_2O$                | 77%   |

**Table S10.** +LSIMS data for all 2:1 H<sub>3</sub>ppba complexes.

| Complex                                                                                        | [M(Hppba)] <sup>+</sup><br><i>m/z</i> | [MH <sub>4</sub> (ppba) <sub>2</sub> ] <sup>+</sup><br><i>m/z</i> |
|------------------------------------------------------------------------------------------------|---------------------------------------|-------------------------------------------------------------------|
| [Al(H <sub>3</sub> ppba) <sub>2</sub> ](NO <sub>3</sub> ) <sub>2</sub> Cl·3CH <sub>3</sub> OH  | 903                                   | 1782                                                              |
| [Ga(H <sub>3</sub> ppba) <sub>2</sub> ](NO <sub>3</sub> ) <sub>2</sub> Cl·3CH <sub>3</sub> OH  | 945                                   | 1825                                                              |
| [In(H <sub>3</sub> ppba) <sub>2</sub> ](NO <sub>3</sub> ) <sub>2</sub> Cl·3CH <sub>3</sub> OH  | 991                                   | 1869                                                              |
| [La(H <sub>4</sub> ppba) <sub>2</sub> ](NO <sub>3</sub> ) <sub>4</sub> Cl·xCH <sub>3</sub> OH  | 1015                                  | 1895                                                              |
| [Ce(H <sub>4</sub> ppba) <sub>2</sub> ](NO <sub>3</sub> ) <sub>4</sub> Cl·xCH <sub>3</sub> OH  | 1016                                  | 1896                                                              |
| [Pr(H <sub>4</sub> ppba) <sub>2</sub> ](NO <sub>3</sub> ) <sub>4</sub> Cl·xCH <sub>3</sub> OH  | 1017                                  | 1897                                                              |
| [Nd(H <sub>4</sub> ppba) <sub>2</sub> ](NO <sub>3</sub> ) <sub>4</sub> Cl·xCH <sub>3</sub> OH  | 1020                                  | 1899                                                              |
| [Sm(H <sub>4</sub> ppba) <sub>2</sub> ](NO <sub>3</sub> ) <sub>4</sub> Cl·xCH <sub>3</sub> OH  | 1028                                  | 1906                                                              |
| [Eu(H <sub>4</sub> ppba) <sub>2</sub> ](NO <sub>3</sub> ) <sub>4</sub> Cl·5CH <sub>3</sub> OH  | 1029                                  | 1908                                                              |
| [Gd(H <sub>4</sub> ppba) <sub>2</sub> ](NO <sub>3</sub> ) <sub>4</sub> Cl·3CH <sub>3</sub> OH  | 1034                                  | 1912                                                              |
| [Tb(H <sub>4</sub> ppba) <sub>2</sub> ](NO <sub>3</sub> ) <sub>4</sub> Cl·10CH <sub>3</sub> OH | 1035                                  | 1913                                                              |
| [Dy(H <sub>4</sub> ppba) <sub>2</sub> ](NO <sub>3</sub> ) <sub>4</sub> Cl·xCH <sub>3</sub> OH  | 1040                                  | 1918                                                              |
| [Ho(H <sub>3</sub> ppba) <sub>2</sub> ](NO <sub>3</sub> ) <sub>2</sub> Cl·3CH <sub>3</sub> OH  | 1041                                  | 1919                                                              |
| [Er(H <sub>3</sub> ppba) <sub>2</sub> ](NO <sub>3</sub> ) <sub>2</sub> Cl·3CH <sub>3</sub> OH  | 1044                                  | 1922                                                              |
| [Tm(H <sub>3</sub> ppba) <sub>2</sub> ](NO <sub>3</sub> ) <sub>2</sub> Cl·3CH <sub>3</sub> OH  | 1045                                  | 1924                                                              |
| [Yb(H <sub>3</sub> ppba) <sub>2</sub> ](NO <sub>3</sub> ) <sub>2</sub> Cl·3CH <sub>3</sub> OH  | 1050                                  | 1928                                                              |
| [Lu(H <sub>3</sub> ppba) <sub>2</sub> ](NO <sub>3</sub> ) <sub>2</sub> Cl·2CH <sub>3</sub> OH  | 1051                                  | 1930                                                              |

**Table S11.** Elemental analyses for selected 2:1 H<sub>3</sub>ppba complexes.

| Complex                                                                                        | C      |         | H      |         | N      |         |
|------------------------------------------------------------------------------------------------|--------|---------|--------|---------|--------|---------|
|                                                                                                | Calcd. | (found) | Calcd. | (found) | Calcd. | (found) |
| [Al(H <sub>3</sub> ppba) <sub>2</sub> ](NO <sub>3</sub> ) <sub>2</sub> Cl·3CH <sub>3</sub> OH  | 58.28  | (58.59) | 6.22   | (6.35)  | 6.86   | (6.69)  |
| [Ga(H <sub>3</sub> ppba) <sub>2</sub> ](NO <sub>3</sub> ) <sub>2</sub> Cl·3CH <sub>3</sub> OH  | 57.08  | (57.39) | 6.10   | (6.13)  | 6.72   | (6.37)  |
| [In(H <sub>3</sub> ppba) <sub>2</sub> ](NO <sub>3</sub> ) <sub>2</sub> Cl·3CH <sub>3</sub> OH  | 55.87  | (56.21) | 5.97   | (5.83)  | 6.58   | (6.50)  |
| [Eu(H <sub>4</sub> ppba) <sub>2</sub> ](NO <sub>3</sub> ) <sub>4</sub> Cl·5CH <sub>3</sub> OH  | 51.46  | (51.45) | 5.90   | (5.66)  | 7.13   | (7.34)  |
| [Gd(H <sub>4</sub> ppba) <sub>2</sub> ](NO <sub>3</sub> ) <sub>4</sub> Cl·3CH <sub>3</sub> OH  | 51.77  | (52.81) | 5.62   | (5.68)  | 7.32   | (6.79)  |
| [Tb(H <sub>4</sub> ppba) <sub>2</sub> ](NO <sub>3</sub> ) <sub>4</sub> Cl·10CH <sub>3</sub> OH | 50.47  | (50.00) | 6.23   | (5.84)  | 6.66   | (6.61)  |
| [Ho(H <sub>3</sub> ppba) <sub>2</sub> ](NO <sub>3</sub> ) <sub>2</sub> Cl·3CH <sub>3</sub> OH  | 54.59  | (54.75) | 5.83   | (5.59)  | 6.43   | (6.81)  |
| [Er(H <sub>3</sub> ppba) <sub>2</sub> ](NO <sub>3</sub> ) <sub>2</sub> Cl·3CH <sub>3</sub> OH  | 54.53  | (54.83) | 5.82   | (5.57)  | 6.42   | (6.71)  |
| [Tm(H <sub>3</sub> ppba) <sub>2</sub> ](NO <sub>3</sub> ) <sub>2</sub> Cl·3CH <sub>3</sub> OH  | 54.49  | (54.91) | 5.82   | (5.61)  | 6.42   | (6.65)  |
| [Yb(H <sub>3</sub> ppba) <sub>2</sub> ](NO <sub>3</sub> ) <sub>2</sub> Cl·3CH <sub>3</sub> OH  | 54.33  | (54.75) | 5.89   | (5.59)  | 6.40   | (6.67)  |
| [Lu(H <sub>3</sub> ppba) <sub>2</sub> ](NO <sub>3</sub> ) <sub>2</sub> Cl·2CH <sub>3</sub> OH  | 54.59  | (54.88) | 5.70   | (5.68)  | 6.50   | (6.37)  |

**Table S12.** +LSIMS data for all 1:1 H<sub>3</sub>ppba complexes.

| Complex                                                                       | [M(Hppba)] <sup>+</sup><br><i>m/z</i> |
|-------------------------------------------------------------------------------|---------------------------------------|
| [La(H <sub>4</sub> ppba)](NO <sub>3</sub> ) <sub>3</sub> Cl·3H <sub>2</sub> O | 1015                                  |
| [Ce(H <sub>4</sub> ppba)](NO <sub>3</sub> ) <sub>3</sub> Cl·5H <sub>2</sub> O | 1016                                  |
| [Pr(H <sub>4</sub> ppba)](NO <sub>3</sub> ) <sub>3</sub> Cl·4H <sub>2</sub> O | 1017                                  |
| [Nd(H <sub>4</sub> ppba)](NO <sub>3</sub> ) <sub>3</sub> Cl·4H <sub>2</sub> O | 1020                                  |
| [Sm(H <sub>4</sub> ppba)](NO <sub>3</sub> ) <sub>3</sub> Cl·3H <sub>2</sub> O | 1028                                  |
| [Eu(H <sub>4</sub> ppba)](NO <sub>3</sub> ) <sub>3</sub> Cl·3H <sub>2</sub> O | 1029                                  |
| [Gd(H <sub>4</sub> ppba)](NO <sub>3</sub> ) <sub>3</sub> Cl·3H <sub>2</sub> O | 1034                                  |
| [Tb(H <sub>4</sub> ppba)](NO <sub>3</sub> ) <sub>3</sub> Cl·3H <sub>2</sub> O | 1035                                  |
| [Dy(H <sub>4</sub> ppba)](NO <sub>3</sub> ) <sub>3</sub> Cl·3H <sub>2</sub> O | 1040                                  |
| [Ho(H <sub>4</sub> ppba)](NO <sub>3</sub> ) <sub>3</sub> Cl·3H <sub>2</sub> O | 1041                                  |
| [Er(H <sub>4</sub> ppba)](NO <sub>3</sub> ) <sub>3</sub> Cl·3H <sub>2</sub> O | 1044                                  |



**Table S13.** Elemental analyses for all 1:1 H<sub>3</sub>ppba complexes.

| Complex                                                                       | C      |          | H      |         | N      |         |
|-------------------------------------------------------------------------------|--------|----------|--------|---------|--------|---------|
|                                                                               | Calcd. | (found)  | Calcd. | (found) | Calcd. | (found) |
| [La(H <sub>4</sub> ppba)](NO <sub>3</sub> ) <sub>3</sub> Cl·3H <sub>2</sub> O | 44.54  | (44.83)  | 4.98   | (4.89)  | 7.57   | (7.20)  |
| [Ce(H <sub>4</sub> ppba)](NO <sub>3</sub> ) <sub>3</sub> Cl·5H <sub>2</sub> O | 43.30  | (43.20)  | 5.15   | (4.90)  | 7.36   | (7.15)  |
| [Pr(H <sub>4</sub> ppba)](NO <sub>3</sub> ) <sub>3</sub> Cl·4H <sub>2</sub> O | 43.86  | (44.12)  | 5.06   | (4.94)  | 7.46   | (7.04)  |
| [Nd(H <sub>4</sub> ppba)](NO <sub>3</sub> ) <sub>3</sub> Cl·4H <sub>2</sub> O | 43.75  | (44.04)  | 5.05   | (4.89)  | 7.44   | (7.02)  |
| [Sm(H <sub>4</sub> ppba)](NO <sub>3</sub> ) <sub>3</sub> Cl·3H <sub>2</sub> O | 44.15  | (43.94)  | 4.94   | (4.68)  | 7.51   | (7.25)  |
| [Eu(H <sub>4</sub> ppba)](NO <sub>3</sub> ) <sub>3</sub> Cl·3H <sub>2</sub> O | 44.10  | (44.58)  | 4.93   | (4.76)  | 7.50   | (7.21)  |
| [Gd(H <sub>4</sub> ppba)](NO <sub>3</sub> ) <sub>3</sub> Cl·3H <sub>2</sub> O | 43.92  | (43.92)  | 4.91   | (4.76)  | 7.47   | (7.31)  |
| [Tb(H <sub>4</sub> ppba)](NO <sub>3</sub> ) <sub>3</sub> Cl·3H <sub>2</sub> O | 43.86  | (44.19)  | 4.91   | (4.75)  | 7.46   | (7.13)  |
| [Dy(H <sub>4</sub> ppba)](NO <sub>3</sub> ) <sub>3</sub> Cl·3H <sub>2</sub> O | 43.74  | (43.98)  | 4.89   | (4.72)  | 7.44   | (7.05)  |
| [Ho(H <sub>4</sub> ppba)](NO <sub>3</sub> ) <sub>3</sub> Cl·3H <sub>2</sub> O | 43.66  | (44.98)* | 4.89   | (4.69)  | 7.43   | (6.98)  |
| [Er(H <sub>4</sub> ppba)](NO <sub>3</sub> ) <sub>3</sub> Cl·3H <sub>2</sub> O | 43.59  | (44.90)* | 4.88   | (4.82)  | 7.41   | (6.91)  |

\* The high carbon content of these complexes is explained in the text.

**Table S14.** +LSIMS data for all 1:1 H<sub>3</sub>ppa complexes.

| Complex                                                                        | [M(Hppa)] <sup>+</sup><br><i>m/z</i> |
|--------------------------------------------------------------------------------|--------------------------------------|
| [Ga(ppa)]·3H <sub>2</sub> O                                                    | 675                                  |
| [In(H <sub>3</sub> ppa)](NO <sub>3</sub> ) <sub>2</sub> Cl·2CH <sub>3</sub> OH | 724                                  |
| [La(H <sub>3</sub> ppa)](NO <sub>3</sub> ) <sub>2</sub> Cl·4H <sub>2</sub> O   | 745                                  |
| [Ce(H <sub>3</sub> ppa)](NO <sub>3</sub> ) <sub>2</sub> Cl·H <sub>2</sub> O    | 746                                  |
| [Pr(H <sub>3</sub> ppa)](NO <sub>3</sub> ) <sub>2</sub> Cl·3H <sub>2</sub> O   | 747                                  |
| [Nd(H <sub>3</sub> ppa)](NO <sub>3</sub> ) <sub>2</sub> Cl·3H <sub>2</sub> O   | 751                                  |
| [Sm(H <sub>3</sub> ppa)](NO <sub>3</sub> ) <sub>2</sub> Cl·3H <sub>2</sub> O   | 758                                  |
| [Eu(H <sub>3</sub> ppa)](NO <sub>3</sub> ) <sub>2</sub> Cl·3H <sub>2</sub> O   | 759                                  |
| [Gd(H <sub>3</sub> ppa)](NO <sub>3</sub> ) <sub>2</sub> Cl·3H <sub>2</sub> O   | 766                                  |
| [Dy(H <sub>3</sub> ppa)](NO <sub>3</sub> ) <sub>2</sub> Cl·H <sub>2</sub> O    | 774                                  |
| [Er(H <sub>3</sub> ppa)](NO <sub>3</sub> ) <sub>2</sub> Cl·2H <sub>2</sub> O   | 776                                  |
| [Yb(H <sub>3</sub> ppa)](NO <sub>3</sub> ) <sub>2</sub> Cl·2H <sub>2</sub> O   | 780                                  |

**Table S15.** Elemental analyses for all 1:1 H<sub>3</sub>ppa complexes.

| Complex                                                                        | C      |         | H      |         | N      |         |
|--------------------------------------------------------------------------------|--------|---------|--------|---------|--------|---------|
|                                                                                | Calcd. | (found) | Calcd. | (found) | Calcd. | (found) |
| [Ga(ppa)]·3H <sub>2</sub> O                                                    | 44.47  | (44.89) | 5.80   | (5.83)  | 7.68   | (7.81)  |
| [In(H <sub>3</sub> ppa)](NO <sub>3</sub> ) <sub>2</sub> Cl·2CH <sub>3</sub> OH | 36.78  | (37.17) | 5.00   | (4.70)  | 8.88   | (8.64)  |
| [La(H <sub>3</sub> ppa)](NO <sub>3</sub> ) <sub>2</sub> Cl·4H <sub>2</sub> O   | 33.13  | (33.33) | 4.84   | (4.64)  | 8.58   | (8.83)  |
| [Ce(H <sub>3</sub> ppa)](NO <sub>3</sub> ) <sub>2</sub> Cl·H <sub>2</sub> O    | 35.02  | (34.72) | 4.46   | (4.44)  | 9.07   | (9.47)  |
| [Pr(H <sub>3</sub> ppa)](NO <sub>3</sub> ) <sub>2</sub> Cl·3H <sub>2</sub> O   | 33.68  | (33.87) | 4.71   | (4.44)  | 8.73   | (8.93)  |
| [Nd(H <sub>3</sub> ppa)](NO <sub>3</sub> ) <sub>2</sub> Cl·3H <sub>2</sub> O   | 33.56  | (33.86) | 4.69   | (4.65)  | 8.70   | (9.00)  |
| [Sm(H <sub>3</sub> ppa)](NO <sub>3</sub> ) <sub>2</sub> Cl·3H <sub>2</sub> O   | 33.35  | (33.50) | 4.66   | (4.49)  | 8.64   | (8.91)  |
| [Eu(H <sub>3</sub> ppa)](NO <sub>3</sub> ) <sub>2</sub> Cl·3H <sub>2</sub> O   | 33.29  | (33.57) | 4.66   | (4.52)  | 8.63   | (8.95)  |
| [Gd(H <sub>3</sub> ppa)](NO <sub>3</sub> ) <sub>2</sub> Cl·3H <sub>2</sub> O   | 33.11  | (32.87) | 4.63   | (4.48)  | 8.58   | (8.55)  |
| [Dy(H <sub>3</sub> ppa)](NO <sub>3</sub> ) <sub>2</sub> Cl·H <sub>2</sub> O    | 34.19  | (34.45) | 4.36   | (4.52)  | 8.86   | (9.15)  |
| [Er(H <sub>3</sub> ppa)](NO <sub>3</sub> ) <sub>2</sub> Cl·2H <sub>2</sub> O   | 33.39  | (33.51) | 4.46   | (4.40)  | 8.65   | (8.58)  |
| [Yb(H <sub>3</sub> ppa)](NO <sub>3</sub> ) <sub>2</sub> Cl·2H <sub>2</sub> O   | 33.19  | (32.98) | 4.44   | (4.58)  | 8.60   | (8.79)  |

### Figure Captions

**Figure S1.** Selected IR spectra of  $[M(H_4ppba)_2](NO_3)_4Cl$ , M as indicated. The IR spectrum of **1** (M=Ga) is included for comparison.

**Figure S2.** IR spectra of  $[Ln(H_4ppba)](NO_3)_3Cl$ , Ln as indicated. The IR spectrum of **1** (M=Ga) is included for comparison.

**Figure S3.** IR spectra of  $[Ln(H_3ppa)](NO_3)_3Cl$ ,  $[In(H_3ppa)](NO_3)_3Cl$ ,  $[Ga(ppa)] \cdot 3H_2O$  (**6**) and  $H_3ppa \cdot HCl \cdot H_2O$ .

**Figure S4.**  $^1H$  NMR spectra (300 MHz) of  $[La(H_3ppa)](NO_3)_3Cl$ ,  $[In(H_3ppa)](NO_3)_3Cl$ ,  $[Ga(ppa)] \cdot 3H_2O$  (**6**) and  $H_3ppa \cdot HCl \cdot H_2O$  in  $d_4$ -methanol; (\* =  $H_2O$  and  $CH_3OH$  impurities).

**Figure S1**

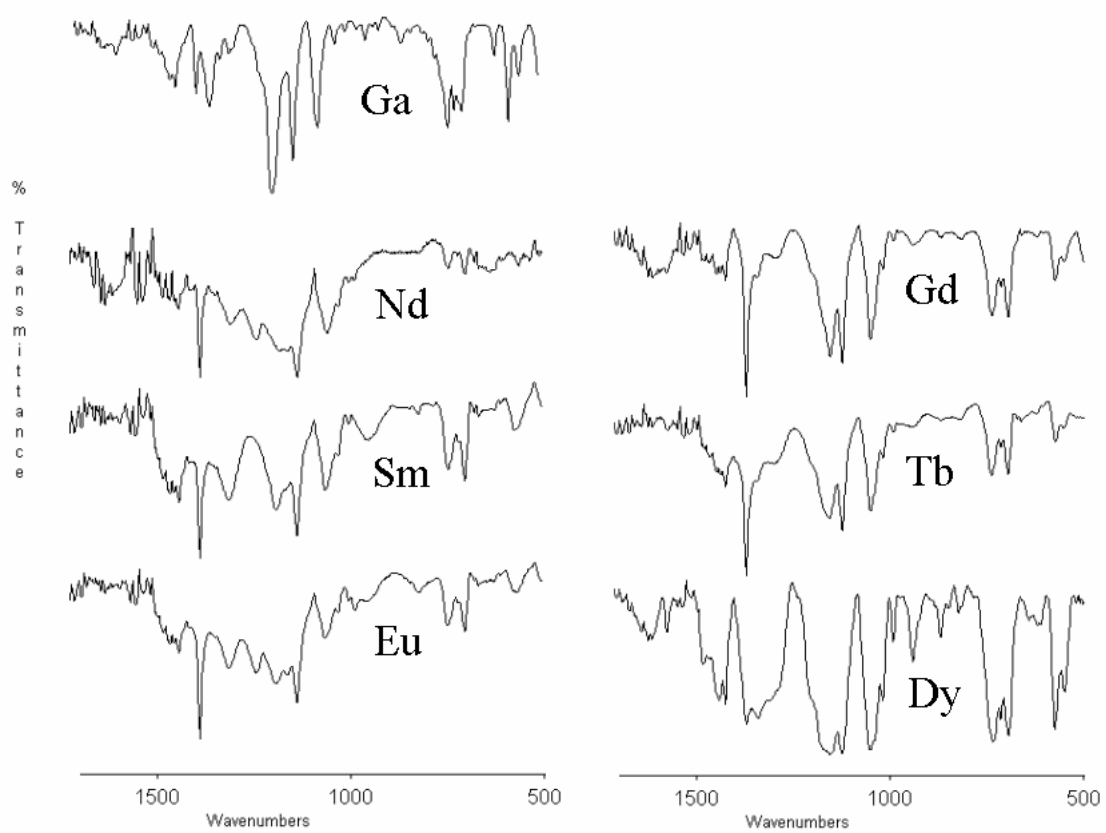

**Figure S2**

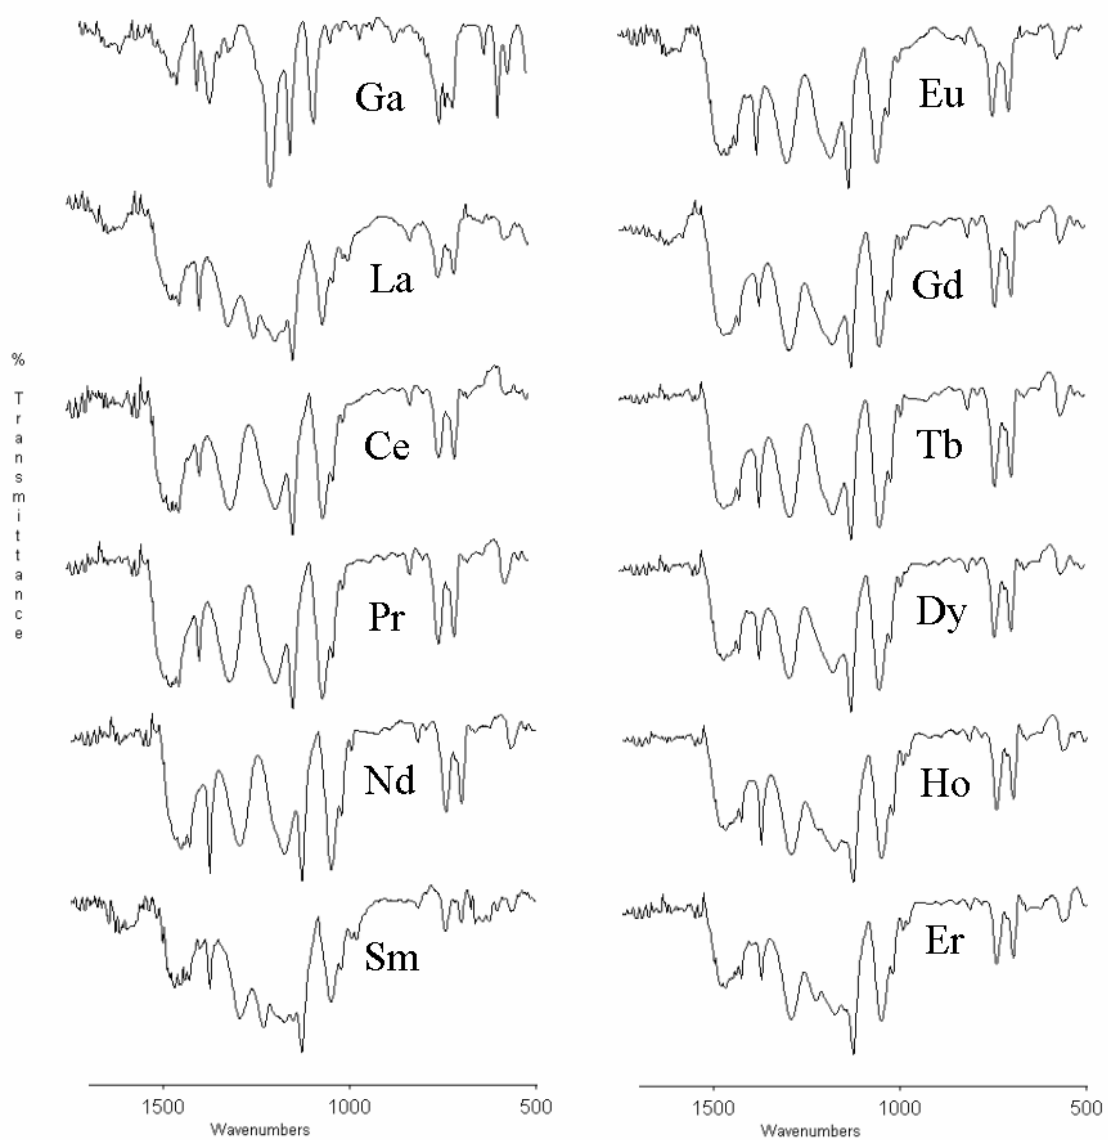

**Figure S3**

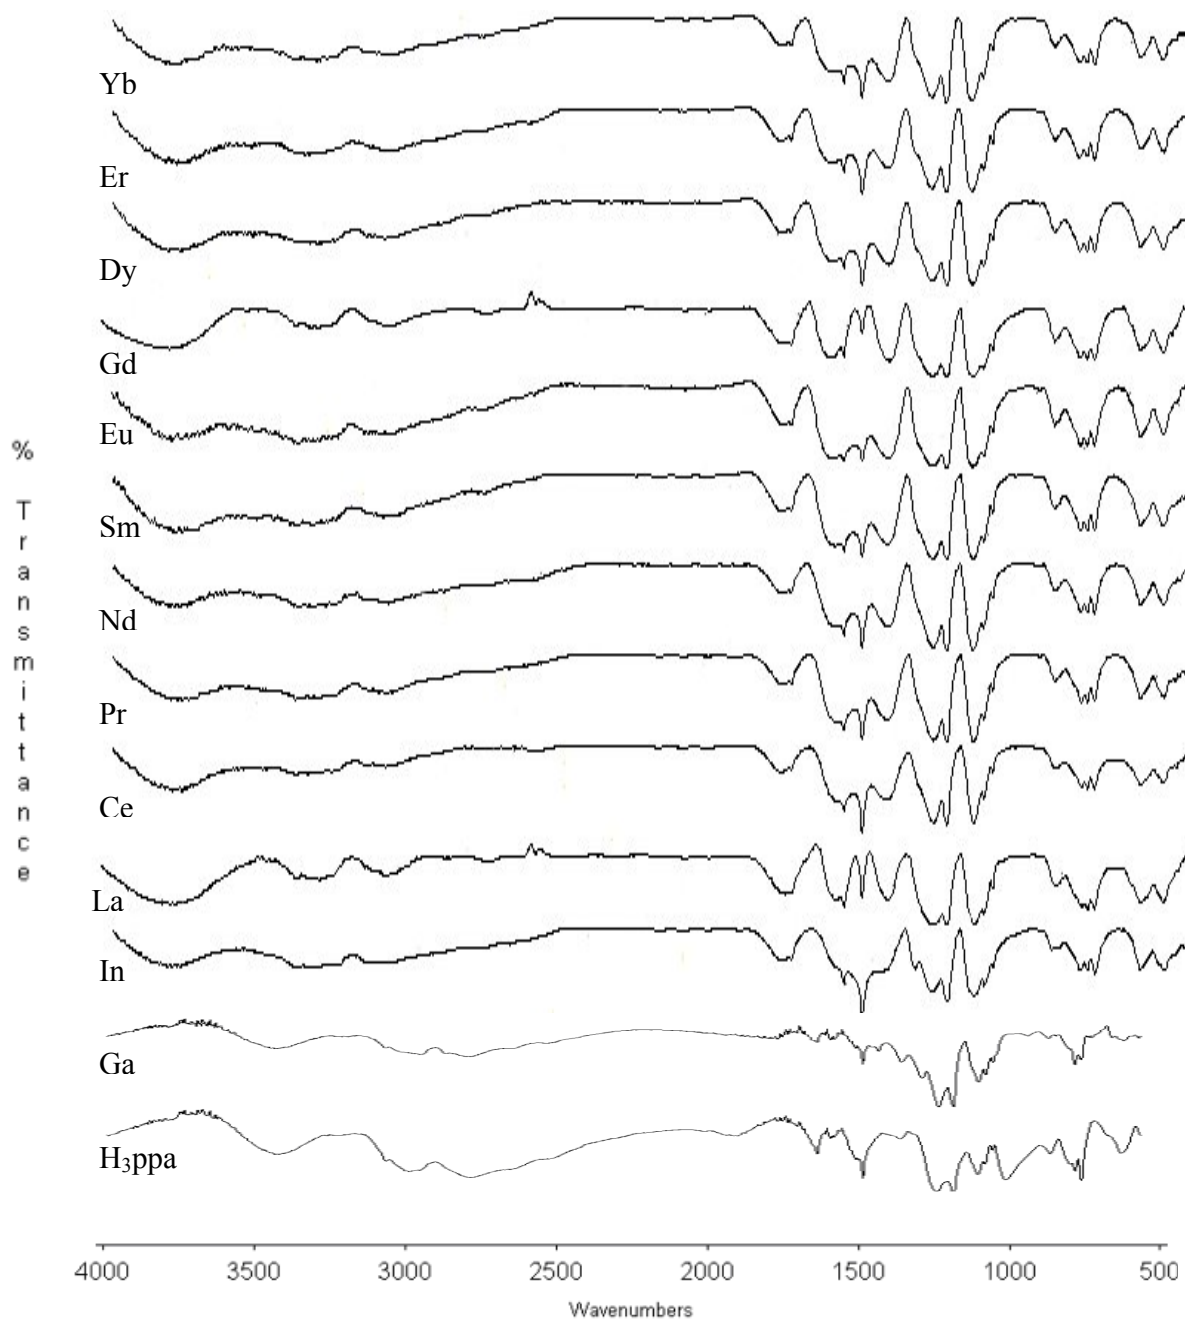

Figure S4

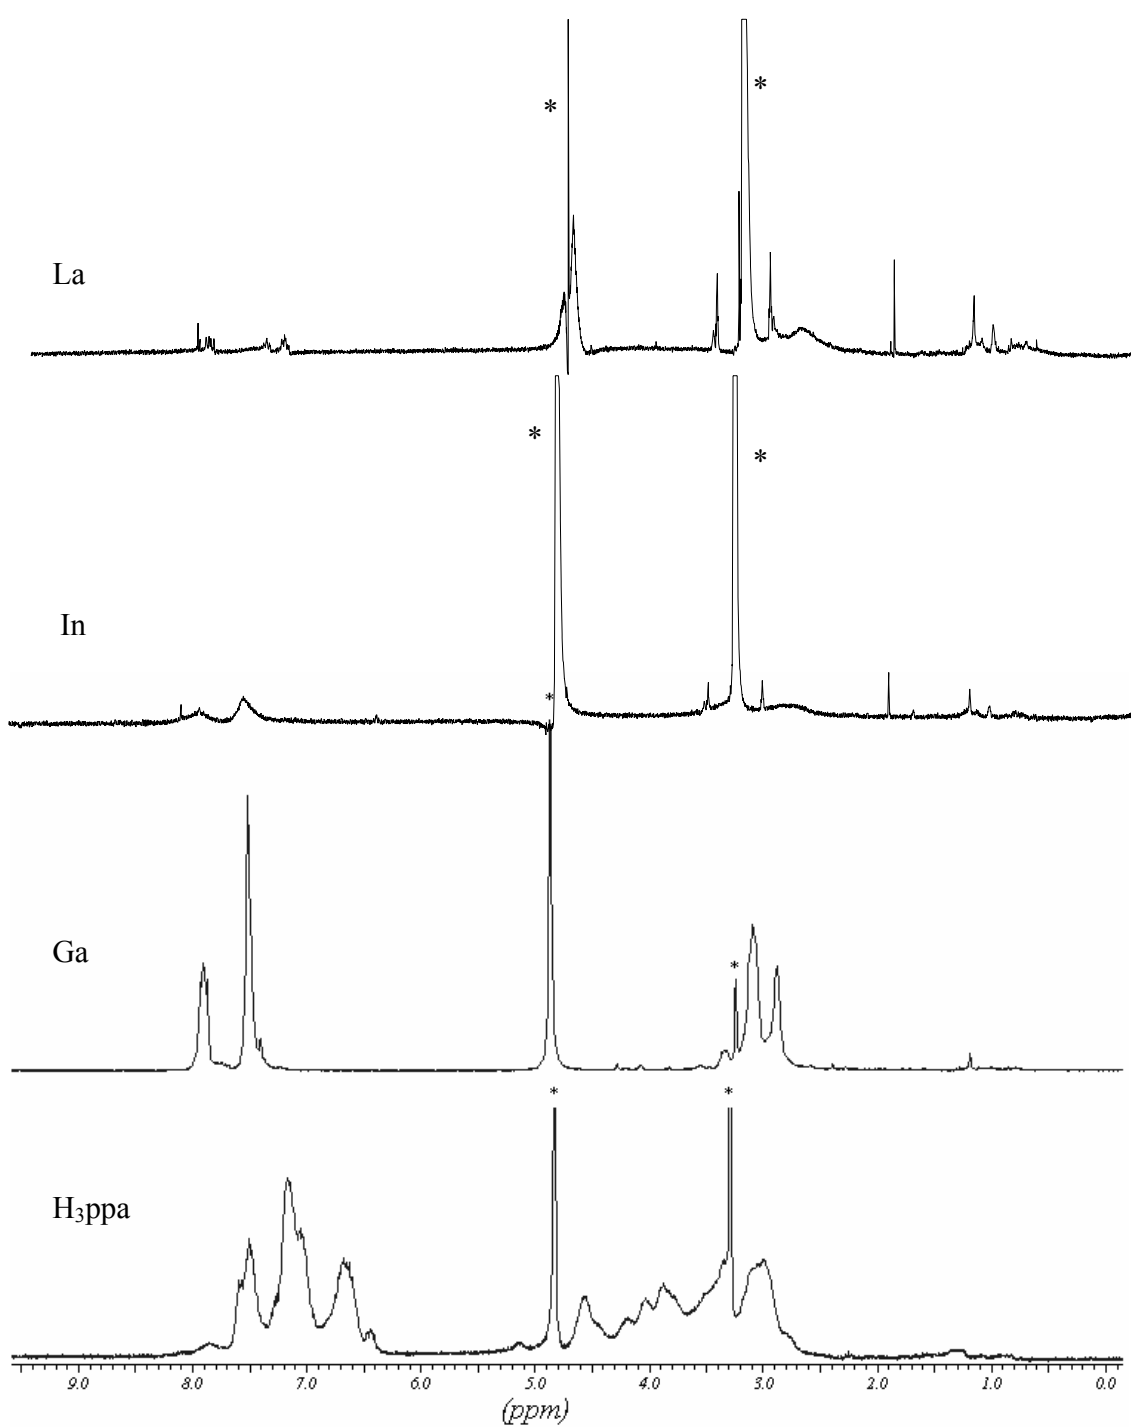

Supplement: b507905e.pdf [file b507905e.pdf]
